# Supplementary material
Source: Springer Nature journal article supplement (https://www.springermedizin.de/resource/supplementary/12887_2013_1057_MOESM1_ESM.pdf/9476358)

Moderate PA levels

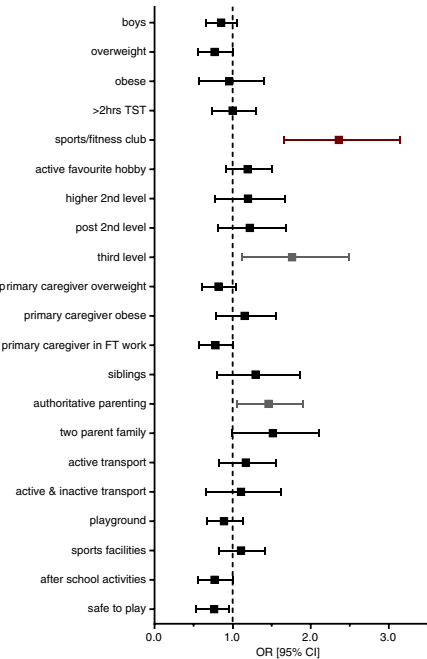

High PA levels

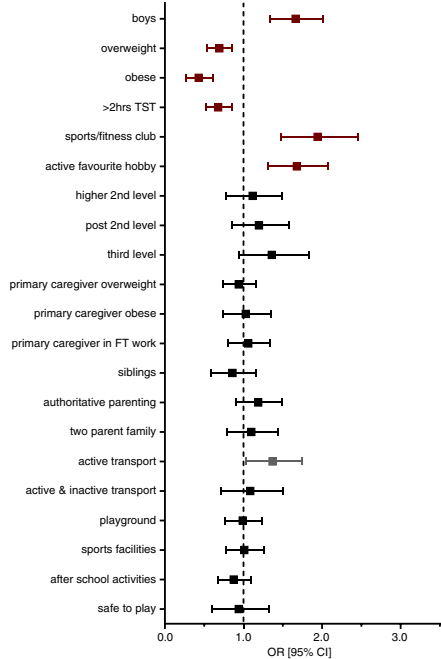

Supplement: MOESM1 [file 9476358]
